# Supplementary material
Source: PubMed Central journal article supplement (PMC7060125)
Supplement: NIHMS1546211-supplement-1.pdf [file NIHMS1546211-supplement-1.pdf]

SUPPLEMENTARY FIGURES AND TABLES

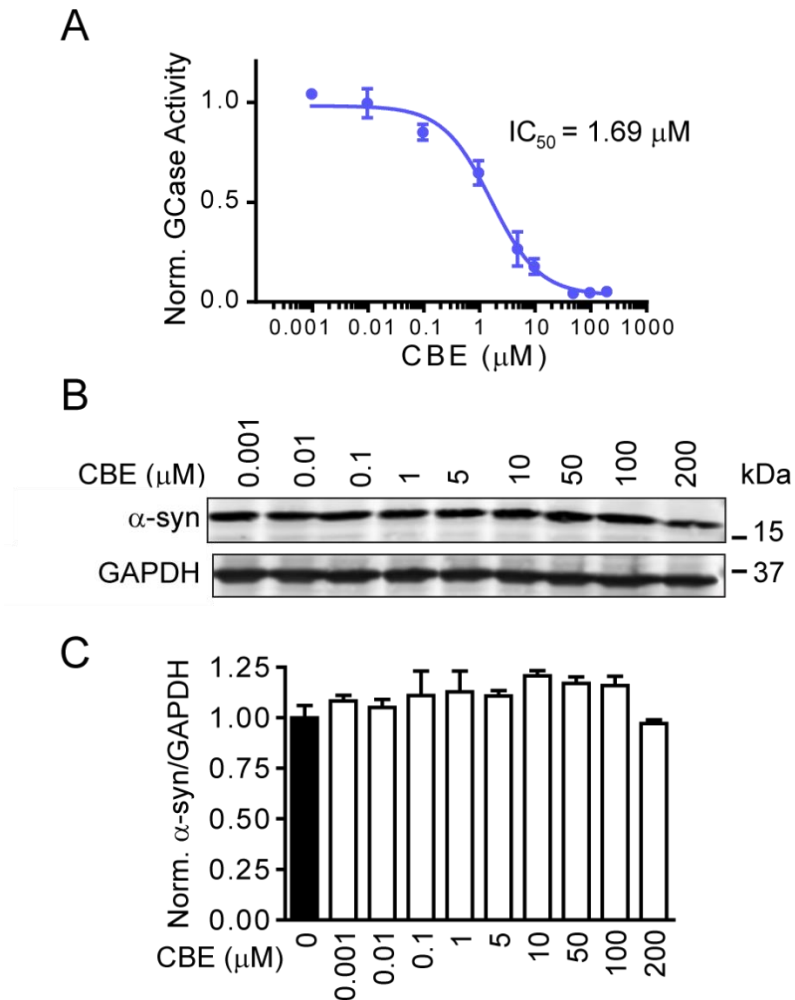

**Figure S1. GCase Inhibition Does Not Elevate  $\alpha$ -Synuclein Levels in Non-Neuronal Cells, Related to Figure 1** (A) HEK293 cells stably overexpressing  $\alpha$ -synuclein (Clone 10) were treated with ascending doses of CBE for 3 days. Cell lysate was used to determine GCase activity. The plotted line is representative of a non-linear fit of values with an estimated  $\text{IC}_{50}$  of  $1.69 \mu\text{M}$  ( $n=3-4/\text{group}$ ). (B) Parallel samples were assayed for total  $\alpha$ -synuclein and GAPDH protein levels. (C) Quantification of  $\alpha$ -synuclein levels indicates that there is no significant change with CBE treatment compared to vehicle treatment (one-way ANOVA with Dunnett's multiple comparison test, All  $p>0.05$ ,  $n=3-4/\text{group}$ ). All plots are means, and error bars represent s.e.m.

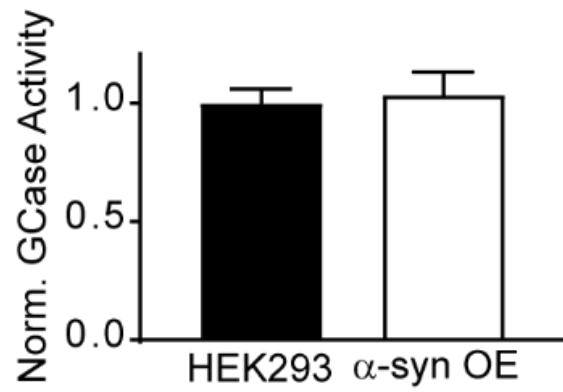

**Figure S2. Constitutive  $\alpha$ -synuclein expression does not reduce GCase activity, Related to Figure 2 (A)** HEK293 cells or HEK293 cells stably overexpressing  $\alpha$ -synuclein (Clone 10) were lysed and used to determine GCase activity. No significant difference was found between the two cell types ( $p=0.7725$ , unpaired t test,  $n=17$ /group). Plot represents means, and error bars represent s.e.m.

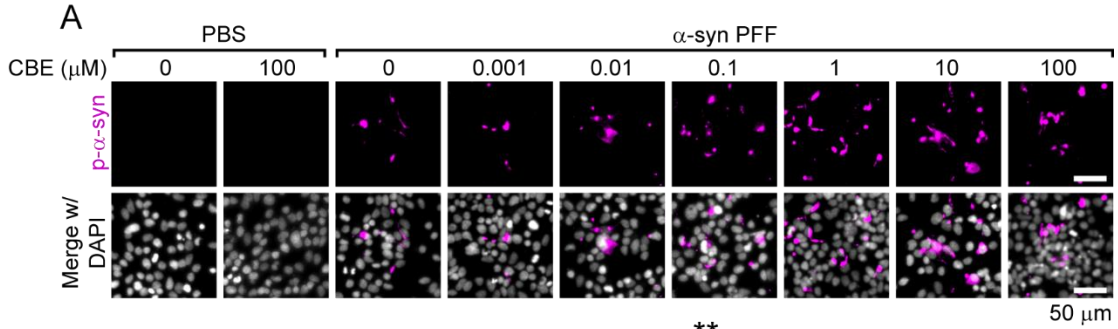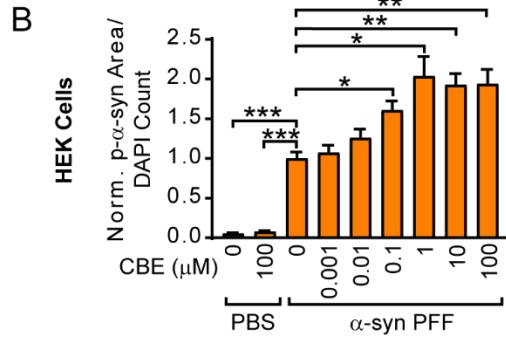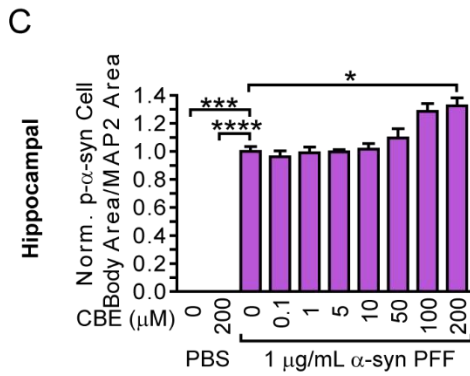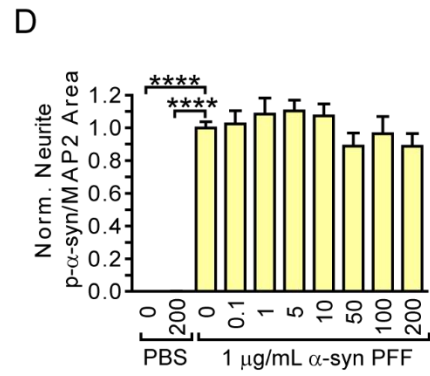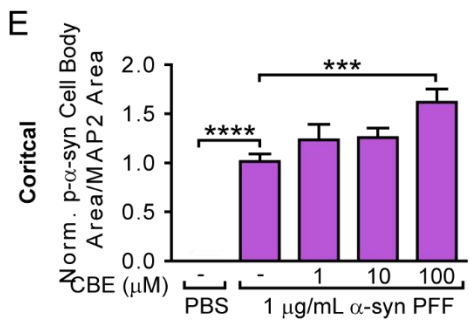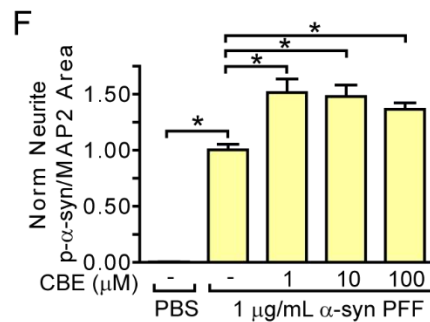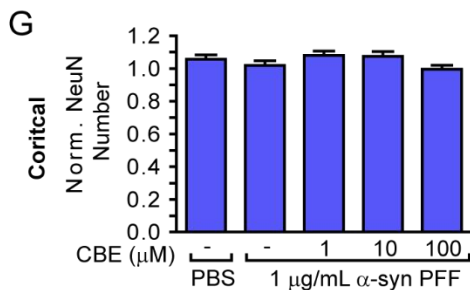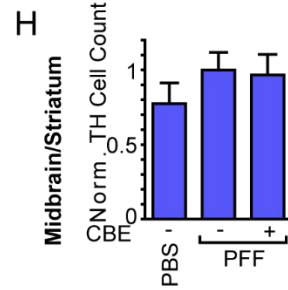

**Figure S3. GCase Inhibition Alters the Amount and Morphology of  $\alpha$ -Synuclein Pathology in HEK Cells and Primary Neurons, Related to Figure 3** (A) HEK293 cells stably overexpressing  $\alpha$ -synuclein (Clone 10) were treated with ascending doses of CBE 1 day prior to transduction with PBS in BioPorter reagent or  $\alpha$ -synuclein PFFs in BioPorter reagent and incubated for 3 days post-transduction. Cells were then fixed and stained for pathological pS129  $\alpha$ -synuclein and DAPI. (B) Quantification of pS129  $\alpha$ -synuclein area/DAPI count in HEK293 cells shows appearance of  $\alpha$ -synuclein pathology with  $\alpha$ -synuclein PFF addition, but not with CBE and a dose-dependent increase in  $\alpha$ -synuclein pathology with CBE addition (Kruskal-Wallis test with Dunn's multiple comparison tests comparing all conditions to  $\alpha$ -synuclein PFF without CBE condition, PBS-0  $\mu$ M CBE \*\*\* $p=0.0004$ , PBS-100  $\mu$ M CBE \*\*\* $p=0.0009$ , PFF-0.1  $\mu$ M CBE \* $p=0.0437$ , PFF-1  $\mu$ M CBE \* $p=0.0261$ , PFF-10  $\mu$ M CBE \*\* $p=0.0019$ , PFF-100  $\mu$ M CBE \*\* $p=0.0087$ , all others  $p>0.05$ ,  $n=23-24$ /group). (C) Primary hippocampal neurons were treated with ascending doses of CBE for 16 days with or without the addition of  $\alpha$ -synuclein PFFs for 14 days and stained for pathological pS129  $\alpha$ -synuclein, MAP2 and NeuN. An analysis algorithm was used to separate cell body pathology by size and shape from neuritic pathology. When assessed in this manner, there is a dose-dependent effect of CBE on  $\alpha$ -synuclein cell body pathology, but not neuritic pathology (Kruskal-Wallis test with Dunn's multiple comparison tests comparing all conditions to  $\alpha$ -synuclein PFF without CBE condition (PBS-0  $\mu$ M CBE \*\*\* $p=0.0002$ , PBS-200  $\mu$ M CBE \*\*\*\* $p<0.0001$ , PFF-200  $\mu$ M CBE  $p=0.0208$ , all others  $p>0.05$ ,  $n=15-18$ /group). (D) Quantification of neuritic pathology in the same neurons as (C). One-way ANOVA with Dunnett's multiple comparison tests comparing all conditions to  $\alpha$ -synuclein PFF without CBE condition (PBS-0  $\mu$ M CBE \*\*\*\* $p<0.0001$ , PBS-200  $\mu$ M CBE \*\*\*\* $p<0.0001$ , all others  $p>0.05$ ,  $n=15-18$ /group). (E) Primary cortical neuron  $\alpha$ -synuclein cell body pathology assayed in the same manner as described above for hippocampal neurons (One-way ANOVA with Dunnett's multiple comparison tests comparing all conditions to  $\alpha$ -synuclein PFF without CBE condition: PBS-0  $\mu$ M CBE \*\*\*\* $p<0.0001$ , PBS-100  $\mu$ M CBE \*\*\* $p=0.0009$ , all others  $p>0.05$ ,  $n=17-18$ /group). (F) Quantification of neuritic pathology in the same neurons as (E). Kruskal-Wallis test with Dunn's multiple comparison tests comparing all conditions to  $\alpha$ -synuclein PFF without CBE condition (PBS-0  $\mu$ M CBE \* $p=0.0161$ , PFF-1  $\mu$ M CBE \* $p=0.0110$ , PFF-10  $\mu$ M CBE \* $p=0.0110$ , PFF-100  $\mu$ M CBE \* $p=0.0233$ ,  $n=17-18$ /group). (G) Primary cortical neuron number (One-way ANOVA with Dunnett's multiple comparison tests comparing all conditions to  $\alpha$ -synuclein PFF without CBE condition: All  $p>0.05$ ,  $n=17-18$ /group). (H) Total TH cell number reveals no effect of  $\alpha$ -synuclein PFF addition or of CBE addition (one-way ANOVA with Dunnett's multiple comparison tests comparing all conditions to  $\alpha$ -synuclein PFF without CBE condition, all  $p>0.05$ ,  $n=6$ /group Data are represented as mean  $\pm$  SEM.

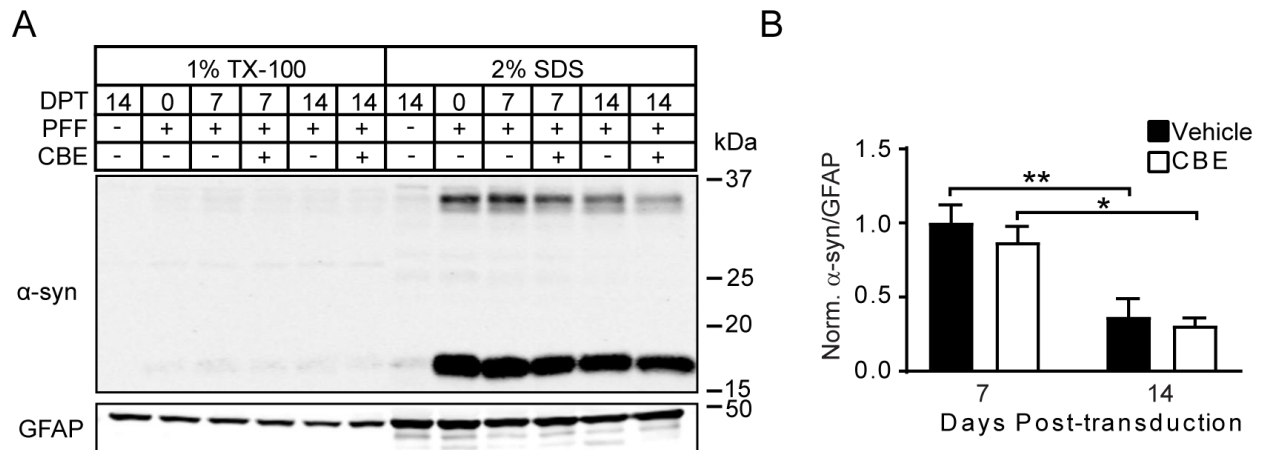

**Figure S4. GCase Inhibition Does Not Change the Degradation of Pathological  $\alpha$ -Synuclein by Astrocytes, Related to Figure 4** (A) Primary astrocytes were treated with 2.5  $\mu$ g/mL  $\alpha$ -synuclein PFFs at multiple timepoints prior to collecting cell lysate as noted. The astrocytes were then extracted in sequentially stronger detergents to separate aggregated from non-aggregated  $\alpha$ -synuclein, which was the majority of  $\alpha$ -synuclein present. (B) Quantification of aggregated  $\alpha$ -synuclein in primary astrocyte cultures 7-14 days after addition of  $\alpha$ -synuclein PFFs. Between days 7-14, over half of  $\alpha$ -synuclein is degraded by astrocytes but there is no change in the rate of degradation with CBE treatment (two-way ANOVA (Vehicle vs. CBE  $p=0.3848$ ) with Sidak's multiple comparisons test comparing within treatment to 7 days post-transduction: Vehicle  $**p=0.0052$ , CBE  $*p=0.0102$ ,  $n=3$ /group). Data are represented as mean  $\pm$  SEM.

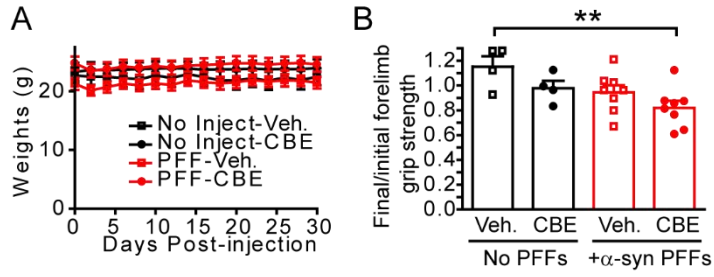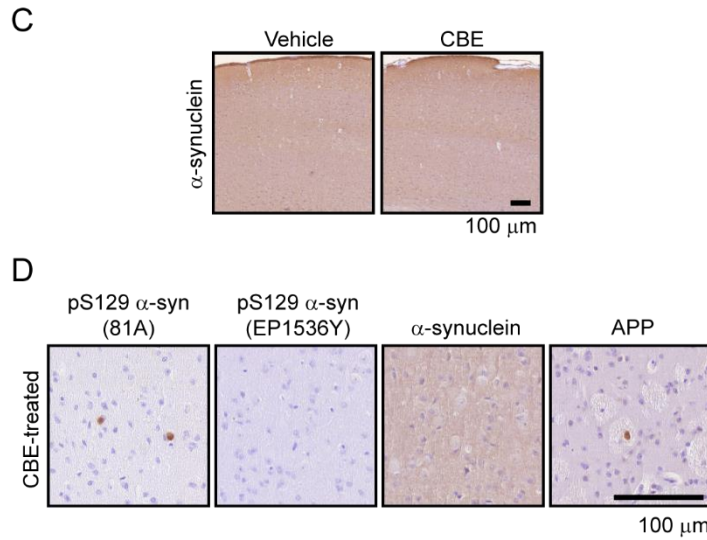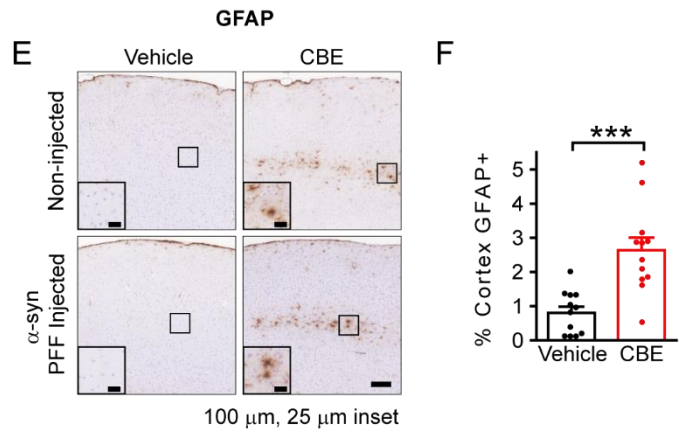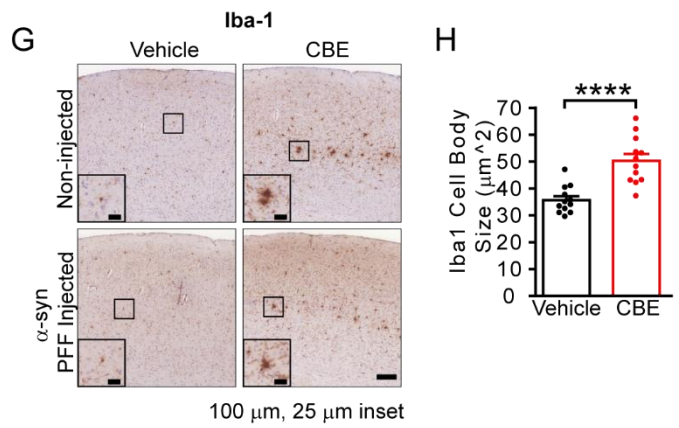

**Figure S5. GCase Inhibition Induces Gliosis But Does Not Induce  $\alpha$ -synuclein Aggregation in Mice,**

**Related to Figure 5** (A) Mice were weighed every other day and mean weight did not change over the course of the study in any of the groups (n=4-8/group). (B) An alternate way to assess grip strength measures is to determine the relative difference from the beginning of the study as final/initial grip strength. By this measure, the combination of  $\alpha$ -synuclein PFFs and CBE treatment is the only group significantly different from the non-injected vehicle group (one-way ANOVA with Dunnett's multiple comparisons test PFF-CBE \*\*p=0.0064, all others p>0.05, n=4-8/group). (C)  $\alpha$ -synuclein staining of somatosensory cortex from mice that had not been injected with  $\alpha$ -synuclein PFFs but were treated with vehicle or CBE. (D) Immunohistochemical staining with various antibodies recognizing pS129  $\alpha$ -synuclein,  $\alpha$ -synuclein or APP. While spheroids can be seen in CBE-treated mouse brains and not in controls with 81A, no similar structure can be seen with a second antibody recognizing pS129  $\alpha$ -synuclein (EP1536Y) or an antibody which recognizes total  $\alpha$ -synuclein. Some spheroids are recognized with an antibody recognizing APP. Scale bars = 100  $\mu$ m. All plots are means with individual values shown, and error bars represent s.e.m. (E) CBE treatment of mice, with or without concurrent  $\alpha$ -synuclein PFF injection, induces robust astrogliosis as visualized by GFAP staining. Images show matched somatosensory cortex from mice with an enlarged image of the region with high GFAP staining in the insets. (F) The percentage of area occupied by GFAP staining in all cortical regions at 0.98 mm and -0.34 mm relative to Bregma was quantified (unpaired t test with Welch's correction \*\*\*p=0.0004, n=12/group). (G) Iba-1 staining reveals microglial profiles. While microglia normally have small cell bodies and extensive processes, CBE treatment induces an activated microglial phenotype with enlarged cell bodies. (H) An object-based algorithm was used to identify Iba-1 cell bodies. The average size of microglial cell bodies was quantified in all cortical regions at 0.98 mm and -0.34 mm relative to Bregma was quantified (unpaired t test with Welch's correction \*\*\*\*p<0.0001, n=12/group). Scale bars = 100  $\mu$ m (25  $\mu$ m, inset). All plots are means with individual values shown, and error bars represent SEM.

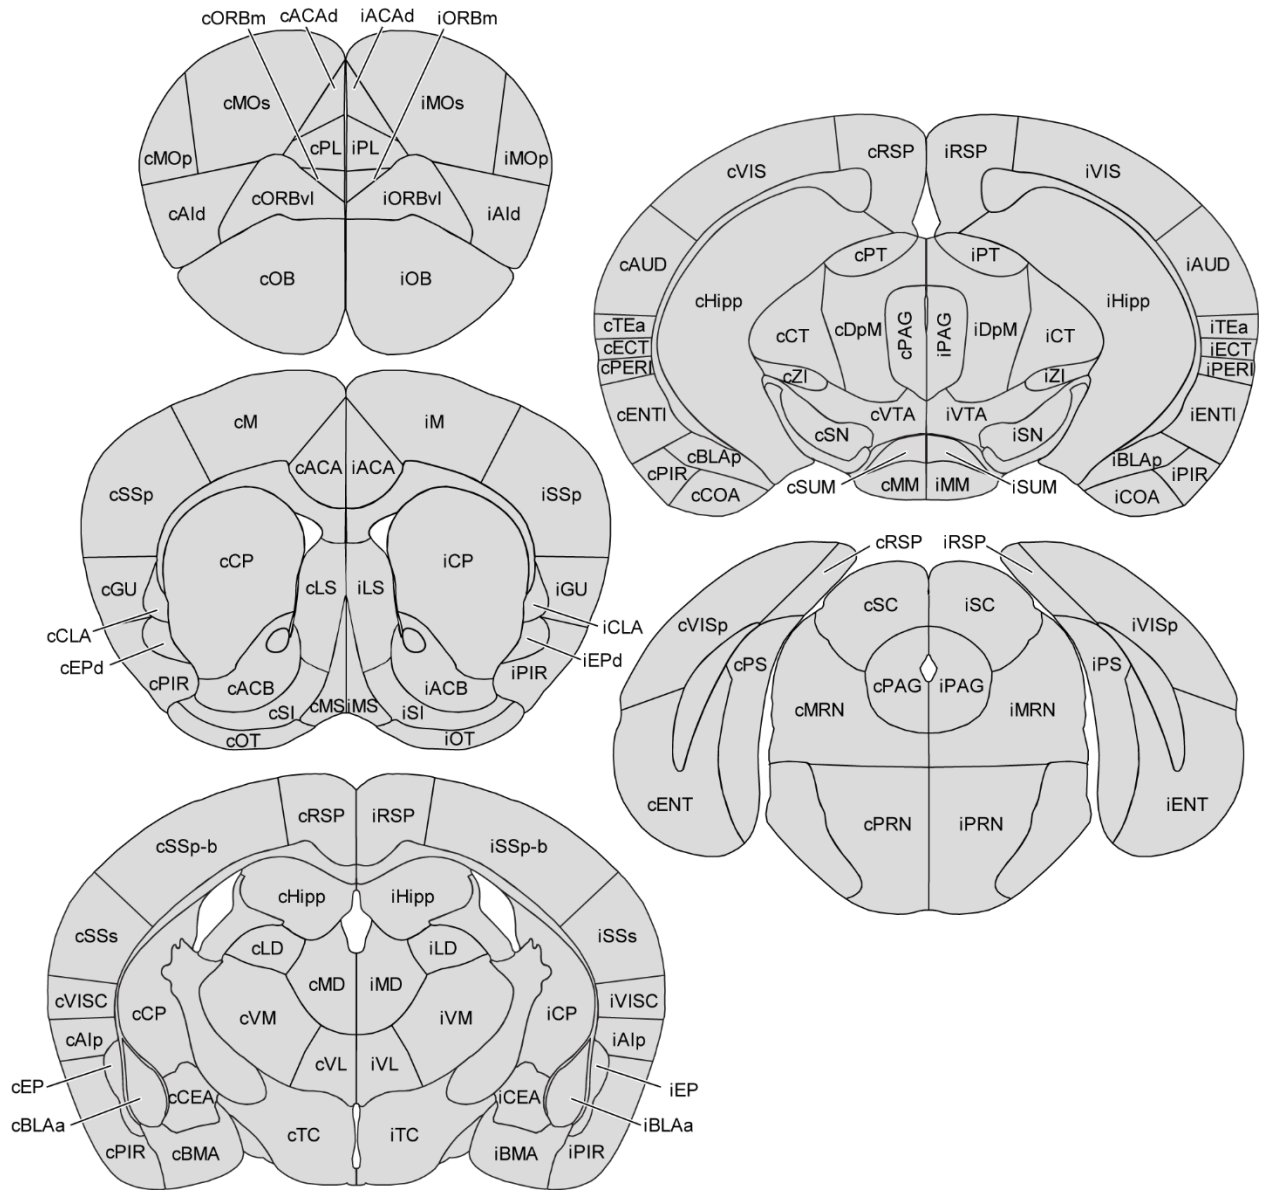

**Figure S6. Brain Region Annotation Key, Related to Figure 6** Each of 132 gray matter brain regions used in analysis of pathological burden are labelled here.



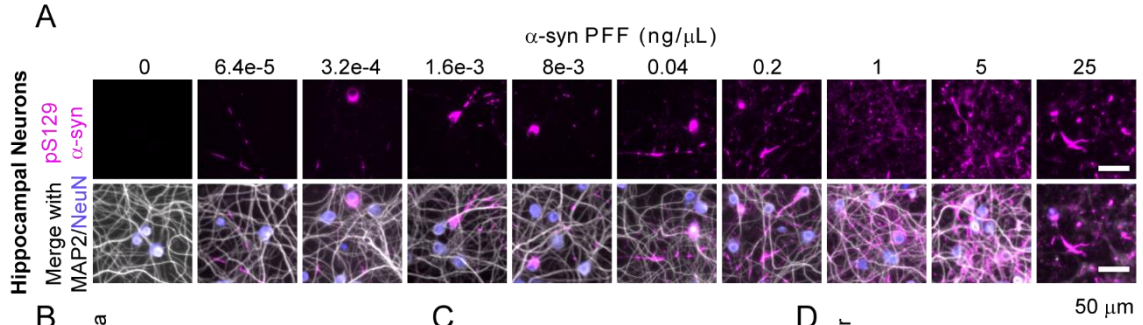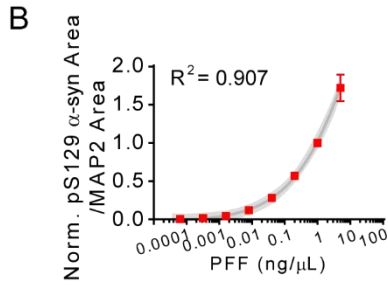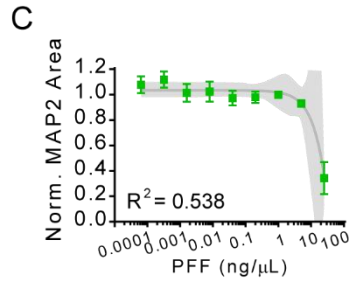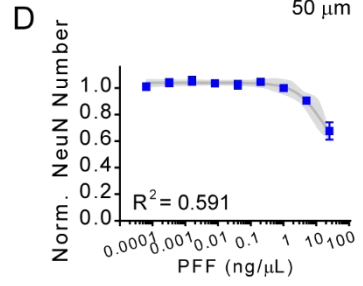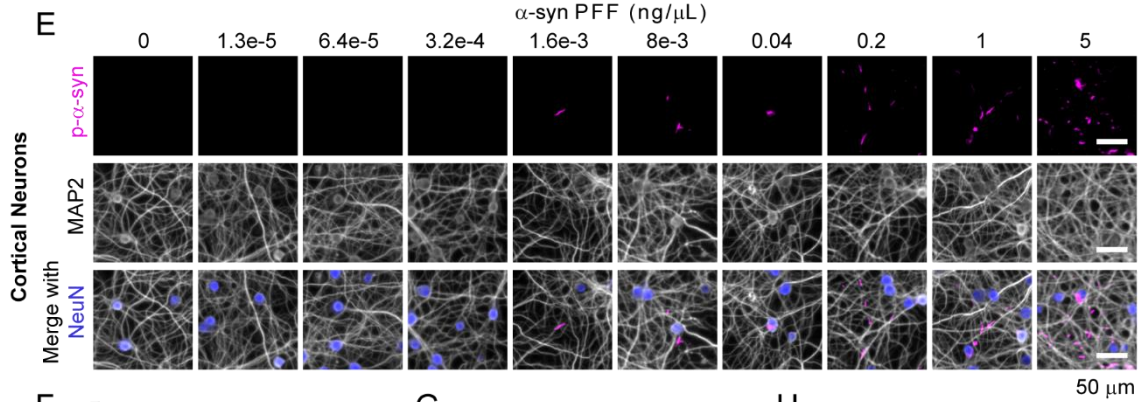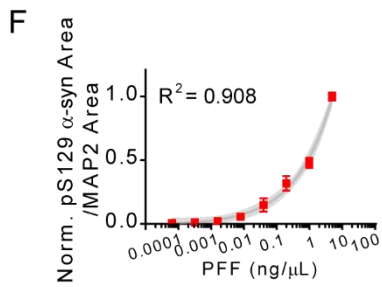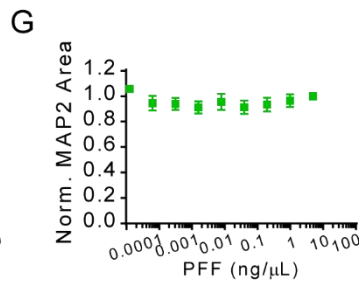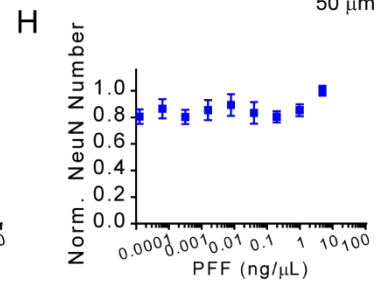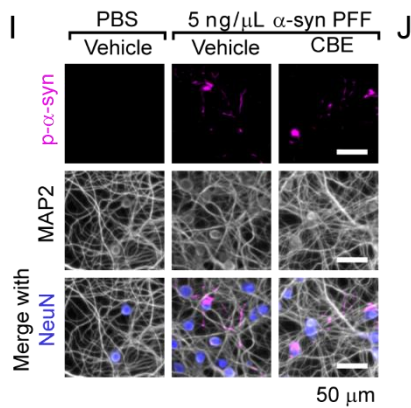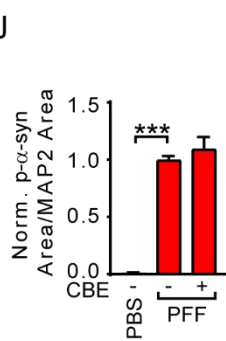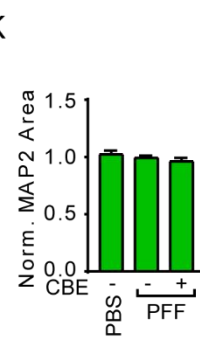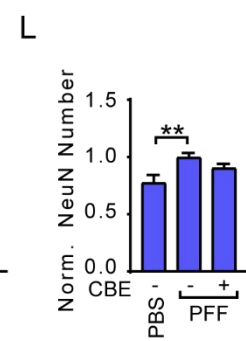

**Figure S7.  $\alpha$ -Synuclein PFFs Induce Dose-Dependent Pathology, and High Pathology Abrogates the Effect of GCase Inhibition, Related to Figure 8**

(A)  $\alpha$ -Synuclein pathology was titrated in primary **hippocampal** neurons by treating with various concentrations of  $\alpha$ -synuclein PFFs and staining for pathological pS129  $\alpha$ -synuclein (magenta), MAP2 (gray) and NeuN (blue). Pathology is reduced at lower concentrations, though a high degree of pathology can be seen in single neurons even at very low concentrations. At 25 ng/ $\mu$ L  $\alpha$ -synuclein PFFs, there is substantial neuron loss, and therefore pathology measures at this concentration are more difficult to interpret. (B)  $\alpha$ -Synuclein PFF dose is directly related to the amount of pathology developed, and this relationship is well fit by a sigmoidal curve (gray line represents a best-fit line with the 95% confidence interval in light gray,  $R^2 = 0.907$ ,  $n=72$ ). There is also a non-linear reduction in MAP2 area (C) and NeuN number (D), (gray line represents a best-fit line with the 95% confidence interval in light gray,  $R^2 = 0.538$  and  $0.591$ , respectively,  $n=81$ ). (E)  $\alpha$ -Synuclein pathology was titrated in primary **cortical** neurons by treating with various concentrations of  $\alpha$ -synuclein PFFs and staining for pathological pS129  $\alpha$ -synuclein (magenta), MAP2 (gray) and NeuN (blue). (F)  $\alpha$ -Synuclein PFF dose is directly related to the amount of pathology developed, and this relationship is well fit by a sigmoidal curve (gray line represents a best-fit line with the 95% confidence interval in light gray,  $R^2 = 0.908$ ,  $n=68$ ). At no dose was  $\alpha$ -synuclein pathology toxic in cortical neurons, so MAP2 area (G) and NeuN number (H) were not able to be fit by a sigmoidal curve. (I) Treatment of cortical neurons with 5 ng/ $\mu$ L  $\alpha$ -synuclein PFFs induces a higher amount of  $\alpha$ -synuclein pathology than in previous experiments, and 100  $\mu$ M CBE treatment does not further elevate pathology. (J) Quantification of pS129  $\alpha$ -synuclein area/MAP2 area reveals no change in pathology with CBE treatment (Kruskal-Wallis test with Dunn's multiple comparisons test to PFF-Vehicle: PBS-Vehicle \*\*\* $p=0.0006$ , PFF-CBE  $p>0.9999$ ,  $n=8-9$ /group). (G) Quantification of MAP2 area reveals no change with CBE treatment (one-way ANOVA with Dunnett's multiple comparisons test to PFF-Vehicle: All  $p$ -values are greater than 0.05,  $n=8-9$ /group). (H) Quantification of NeuN reduction in neurons with CBE treatment (one-way ANOVA with Dunnett's multiple comparisons test to PFF-Vehicle: PBS-Vehicle \*\* $p=0.0068$ , PFF-CBE  $p=0.3089$ ,  $n=8-9$ /group). Scale bars = 50  $\mu$ m. Data are represented as mean  $\pm$  SEM.

**Table S1. Clinical information for cases used for extraction of pathological  $\alpha$ -synuclein**

| Case No. | Clinical Diagnosis | Pathological Diagnosis | Race  | Sex    | Age of Disease onset | Age at Death | PMI (h) | Brain Region Used | $\alpha$ -Synuclein ( $\mu\text{g/ml}$ ) |
|----------|--------------------|------------------------|-------|--------|----------------------|--------------|---------|-------------------|------------------------------------------|
| 1        | AD Prob.           | AD                     | White | Female | 52                   | 62           | 11      | Midfrontal        | 21.57                                    |
| 2        | PDD                | PDD                    | White | Female | 51                   | 66           | 12      | Midfrontal        | 24.56                                    |
| 3        | CBS                | AD                     | White | Female | 45                   | 55           | 15      | Midfrontal        | 22.43                                    |
| 4        | PDD                | PDD                    | White | Male   | 60                   | 72           | 19      | Cingulate         | 8.28                                     |
| 5        | DLB                | DLB                    | White | Male   | 76                   | 83           | 6       | Cingulate         | 7.55                                     |
| 6        | DLB                | PDD                    | White | Male   | 66                   | 72           | 9       | Cingulate         | 9.52                                     |
| 7        | PDD                | PDD                    | White | Male   | 49                   | 70           | 12.5    | Cingulate         | 8.49                                     |

PMI: postmortem interval

**Table S1, Related to Figure 8.** A list of demographic and pathology information for the four human cases used in this study for extraction of pathological  $\alpha$ -synuclein.
